# Supplementary material
Source: PubMed Central journal article supplement (PMC4715796)

**Supplementary Table 1.** Complete list of enriched gene sets in lung, liver and kidney based on GSEA. Red boxes denote upregulation during MV+SA, whereas blue boxes indicate relative upregulation under Control condition.

| LUNG                                                                              |                    |
|-----------------------------------------------------------------------------------|--------------------|
| Gene Set                                                                          | Enrichment Profile |
| REACTOME_CHEMOKINE_RECEPTORS_BIND_CHEMOKINES                                      |                    |
| KEGG_TOLL_LIKE_RECEPTOR_SIGNALING_PATHWAY                                         |                    |
| REACTOME_SIGNALING_IN_IMMUNE_SYSTEM                                               |                    |
| KEGG_JAK_STAT_SIGNALING_PATHWAY                                                   |                    |
| KEGG_LEISHMANIA_INFECTION                                                         |                    |
| KEGG_CYTOKINE_CYTOKINE_RECEPTOR_INTERACTION                                       |                    |
| KEGG_CYTOSOLIC_DNA_SENSING_PATHWAY                                                |                    |
| REACTOME_S_PHASE                                                                  |                    |
| REACTOME_SYNTHESIS_OF_DNA                                                         |                    |
| KEGG_CHEMOKINE_SIGNALING_PATHWAY                                                  |                    |
| REACTOME_G1_S_TRANSITION                                                          |                    |
| REACTOME_IMMUNOREGULATORY_INTERACTIONS_BETWEEN_A_LYMPHOID_AND_A_NON_LYMPHOID_CELL |                    |
| REACTOME_INNATE_IMMUNITY_SIGNALING                                                |                    |
| REACTOME_DNA_REPLICATION_PRE_INITIATION                                           |                    |
| ST_TUMOR_NECROSIS_FACTOR_PATHWAY                                                  |                    |
| KEGG_NATURAL_KILLER_CELL_MEDIATED_CYTOTOXICITY                                    |                    |
| REACTOME_TOLL_LIKE_RECEPTOR_4_CASCADE                                             |                    |
| KEGG_T_CELL_RECEPTOR_SIGNALING_PATHWAY                                            |                    |
| KEGG_NOD_LIKE_RECEPTOR_SIGNALING_PATHWAY                                          |                    |
| REACTOME_CYTOSOLIC_TRNA_AMINOACYLATION                                            |                    |
| REACTOME_TOLL_RECEPTOR_CASCADES                                                   |                    |
| REACTOME_ORC1_REMOVAL_FROM_CHROMATIN                                              |                    |
| KEGG_APOPTOSIS                                                                    |                    |
| BIOCARTA_CASPASE_PATHWAY                                                          |                    |
| REACTOME_SCF_SKP2_MEDIATED_DEGRADATION_OF_P27_P21                                 |                    |
| REACTOME_ACTIVATED_TLR4_SIGNALING                                                 |                    |
| REACTOME_MYD88_CASCADE                                                            |                    |
| REACTOME_DNA_STRAND_ELONGATION                                                    |                    |
| REACTOME_M_G1_TRANSITION                                                          |                    |
| REACTOME_HOST_INTERACTIONS_OF_HIV_FACTORS                                         |                    |
| KEGG_PROTEASOME                                                                   |                    |
| KEGG_INTESTINAL_IMMUNE_NETWORK_FOR_IGA_PRODUCTION                                 |                    |
| REACTOME_COSTIMULATION_BY_THE_CD28_FAMILY                                         |                    |
| BIOCARTA_IL10_PATHWAY                                                             |                    |
| REACTOME_STABILIZATION_OF_P53                                                     |                    |
| KEGG_DNA_REPLICATION                                                              |                    |
| BIOCARTA_HIVNEF_PATHWAY                                                           |                    |
| REACTOME_CYCLIN_E_ASSOCIATED_EVENTS_DURING_G1_S_TRANSITION                        |                    |
| REACTOME_P53_INDEPENDENT_DNA_DAMAGE_RESPONSE                                      |                    |
| KEGG_RIG_I_LIKE_RECEPTOR_SIGNALING_PATHWAY                                        |                    |
| BIOCARTA_NFKB_PATHWAY                                                             |                    |
| REACTOME_TOLL_LIKE_RECEPTOR_9_CASCADE                                             |                    |
| KEGG_GRAFT_VERSUS_HOST_DISEASE                                                    |                    |
| BIOCARTA_IL22BP_PATHWAY                                                           |                    |
| BIOCARTA_GNANULOCYTES_PATHWAY                                                     |                    |
| BIOCARTA_DEATH_PATHWAY                                                            |                    |
| BIOCARTA_IL6_PATHWAY                                                              |                    |
| BIOCARTA_TOLL_PATHWAY                                                             |                    |
| BIOCARTA_LAIR_PATHWAY                                                             |                    |
| REACTOME_PEPTIDE_LIGAND_BINDING_RECEPTORS                                         |                    |
| REACTOME_SCF_BETA_TRCP_MEDIATED_DEGRADATION_OF_EMI1                               |                    |
| REACTOME_VIF_MEDIATED_DEGRADATION_OF_APOBEC3G                                     |                    |
| REACTOME_CDT1_ASSOCIATION_WITH_THE_CDC6_ORC_ORIGIN_COMPLEX                        |                    |
| BIOCARTA_DC_PATHWAY                                                               |                    |
| REACTOME_CELL_CYCLE_CHECKPOINTS                                                   |                    |
| REACTOME_EXTENSION_OF_TELOMERES                                                   |                    |
| BIOCARTA_IL2RB_PATHWAY                                                            |                    |
| KEGG_ANTIGEN_PROCESSING_AND_PRESENTATION                                          |                    |
| REACTOME_INITIAL_TRIGGERING_OF_COMPLEMENT                                         |                    |
| BIOCARTA_GLYCOLYSIS_PATHWAY                                                       |                    |
| BIOCARTA_INFLAM_PATHWAY                                                           |                    |

BIOCARTA\_NKT\_PATHWAY  
KEGG\_ALLOGRAFT\_REJECTION  
KEGG\_LYSOSOME  
REACTOME\_TRNA\_AMINOACYLATION  
BIOCARTA\_TNFR2\_PATHWAY  
KEGG\_GALACTOSE\_METABOLISM  
REACTOME\_COMPLEMENT\_CASCADE  
REACTOME\_TCR\_SIGNALING  
REACTOME\_HIV\_INFECTION  
BIOCARTA\_COMP\_PATHWAY  
BIOCARTA\_CTL\_PATHWAY  
REACTOME\_PD1\_SIGNALING  
REACTOME\_UNWINDING\_OF\_DNA  
REACTOME\_ACTIVATION\_OF\_THE\_PRE\_REPLICATIVE\_COMPLEX  
BIOCARTA\_IL3\_PATHWAY  
BIOCARTA\_CTLA4\_PATHWAY  
KEGG\_COMPLEMENT\_AND\_COAGULATION\_CASCADES  
BIOCARTA\_HSP27\_PATHWAY  
REACTOME\_METABOLISM\_OF\_CARBOHYDRATES  
KEGG\_P53\_SIGNALING\_PATHWAY  
KEGG\_FC\_GAMMA\_R\_MEDIATED\_PHAGOCYTOSIS  
REACTOME\_CLASS\_A1\_RHODOPSIN\_LIKE\_RECEPTORS  
KEGG\_PRIMARY\_IMMUNODEFICIENCY  
REACTOME\_REGULATION\_OF\_ORNITHINE\_DECARBOXYLASE  
BIOCARTA\_IL2\_PATHWAY  
KEGG\_AUTOIMMUNE\_THYROID\_DISEASE  
REACTOME\_G\_ALPHA\_I\_SIGNALLING\_EVENTS  
BIOCARTA\_NO2IL12\_PATHWAY  
REACTOME\_GLYCOLYSIS  
REACTOME\_APOPTOSIS  
REACTOME\_LAGGING\_STRAND\_SYNTHESIS  
KEGG\_AMINOACYL\_TRNA\_BIOSYNTHESIS  
REACTOME\_G2\_M\_CHECKPOINTS  
KEGG\_FRUCTOSE\_AND\_MANNANOSE\_METABOLISM  
BIOCARTA\_IL1R\_PATHWAY  
KEGG\_EPITHELIAL\_CELL\_SIGNALING\_IN\_HELICOBACTER\_PYLORI\_INFECTION  
REACTOME\_TOLL\_LIKE\_RECEPTOR\_3\_CASCADE  
ST\_T\_CELL\_SIGNAL\_TRANSDUCTION  
ST\_B\_CELL\_ANTIGEN\_RECEPTOR  
BIOCARTA\_PML\_PATHWAY  
REACTOME\_GENERATION\_OF\_SECOND\_MESSENGER\_MOLECULES  
BIOCARTA\_CLASSIC\_PATHWAY  
KEGG\_ASTHMA  
KEGG\_STEROID\_BIOSYNTHESIS  
REACTOME\_HUMAN\_TAK1\_ACTIVATES\_NFKB\_BY\_PHOSPHORYLATION\_AND\_ACTIVATION\_OF\_IKKS\_COMPLEX  
REACTOME\_VIRAL\_DSRNA\_TLR3\_TRIF\_COMPLEX\_ACTIVATES\_RIP1  
REACTOME\_MITOTIC\_M\_M\_G1\_PHASES  
REACTOME\_CD28\_DEPENDENT\_VAV1\_PATHWAY  
REACTOME\_CHOLESTEROL\_BIOSYNTHESIS  
REACTOME\_POLYMERASE\_SWITCHING  
KEGG\_B\_CELL\_RECEPTOR\_SIGNALING\_PATHWAY  
REACTOME\_SIGNALING\_BY\_WNT  
BIOCARTA\_MONOCYTE\_PATHWAY  
REACTOME\_CD28\_CO\_STIMULATION  
BIOCARTA\_MITOCHONDRIA\_PATHWAY  
ST\_INTERLEUKIN\_4\_PATHWAY  
BIOCARTA\_CYTOKINE\_PATHWAY  
BIOCARTA\_SODD\_PATHWAY  
REACTOME\_GLUCOSE\_TRANSPORT  
BIOCARTA\_RANMS\_PATHWAY  
BIOCARTA\_TCYTOTOXIC\_PATHWAY  
REACTOME\_METAL\_ION\_SLC\_TRANSPORTERS  
BIOCARTA\_TCRA\_PATHWAY  
REACTOME\_DEATH\_RECEPTOR\_SIGNALLING  
KEGG\_AMINO\_SUGAR\_AND\_NUCLEOTIDE\_SUGAR\_METABOLISM  
KEGG\_CHRONIC\_MYELOID\_LEUKEMIA

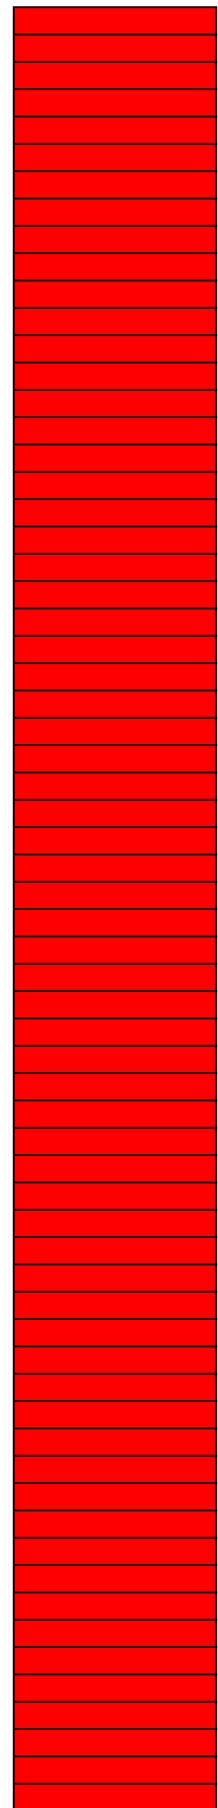

BIOCARTA\_EPONFKB\_PATHWAY  
BIOCARTA\_FAS\_PATHWAY  
REACTOME\_ACTIVATION\_OF\_ATR\_IN\_RESPONSE\_TO\_REPLICATION\_STRESS  
KEGG\_TYPE\_I\_DIABETES\_MELLITUS  
REACTOME\_GLUconeogenesis  
BIOCARTA\_TCAPOPTOSIS\_PATHWAY  
KEGG\_FC\_EPSILON\_RI\_SIGNALING\_PATHWAY  
BIOCARTA\_CD40\_PATHWAY  
REACTOME\_INTRINSIC\_PATHWAY\_FOR\_APOPTOSIS  
REACTOME\_CELL\_CYCLE\_MITOTIC  
BIOCARTA\_THELPER\_PATHWAY  
BIOCARTA\_RANKL\_PATHWAY  
REACTOME\_EARLY\_PHASE\_OF\_HIV\_LIFE\_CYCLE  
REACTOME\_HEMOSTASIS  
KEGG\_ACUTE\_MYELOID\_LEUKEMIA  
BIOCARTA\_TID\_PATHWAY  
ST\_FAS\_SIGNALING\_PATHWAY  
REACTOME\_CDC20\_PHOSPHO\_APC\_MEDIATED\_DEGRADATION\_OF\_CYCLIN\_A  
REACTOME\_UNFOLDED\_PROTEIN\_RESPONSE  
REACTOME\_DOWNSTREAM\_TCR\_SIGNALING  
BIOCARTA\_EGF\_PATHWAY  
REACTOME\_SIGNALLING\_TO\_RAS  
BIOCARTA\_GLEEVEC\_PATHWAY  
BIOCARTA\_TPO\_PATHWAY  
BIOCARTA\_BLYMPHOCYTE\_PATHWAY  
BIOCARTA\_P53\_PATHWAY  
KEGG\_LEUKOCYTE\_TRANSENDOTHELIAL\_MIGRATION  
BIOCARTA\_IL7\_PATHWAY  
BIOCARTA\_TNFR1\_PATHWAY  
REACTOME\_REGULATION\_OF\_APC\_ACTIVATORS\_BETWEEN\_G1\_S\_AND\_EARLY\_ANAPHASE  
REACTOME\_COLLAGEN\_MEDIATED\_ACTIVATION\_CASCADE  
REACTOME\_AUTODEGRADATION\_OF\_CDH1\_BY\_CDH1\_APC  
REACTOME\_REMOVAL\_OF\_THE\_FLAP\_INTERMEDIATE  
BIOCARTA\_RELA\_PATHWAY  
BIOCARTA\_STEM\_PATHWAY  
REACTOME\_TRANSLOCATION\_OF\_ZAP70\_TO\_IMMUNOLOGICAL\_SYNAPSE  
BIOCARTA\_TH1TH2\_PATHWAY  
REACTOME\_E2F\_TRANSCRIPTIONAL\_TARGETS\_AT\_G1\_S  
REACTOME\_CELL\_SURFACE\_INTERACTIONS\_AT\_THE\_VASCULAR\_WALL  
REACTOME\_METABLISM\_OF\_NUCLEOTIDES  
BIOCARTA\_PDGF\_PATHWAY  
BIOCARTA\_GSK3\_PATHWAY  
BIOCARTA\_EPO\_PATHWAY  
BIOCARTA\_D4GDI\_PATHWAY  
ST\_STAT3\_PATHWAY  
BIOCARTA\_IL5\_PATHWAY  
REACTOME\_NUCLEAR\_IMPORT\_OF\_REV\_PROTEIN  
KEGG\_HEMATOPOIETIC\_CELL\_LINEAGE  
BIOCARTA\_ATM\_PATHWAY  
BIOCARTA\_RNA\_PATHWAY  
REACTOME\_REPAIR\_SYNTHESIS\_OF\_PATCH\_27\_30\_BASES\_LONG\_BY\_DNA\_POLYMERASE  
REACTOME\_TRAF6\_MEDIATED\_INDUCION\_OF\_THE\_ANTIVIRAL\_CYTOKINE\_IFN\_ALPHA\_BETA\_CASCADE  
REACTOME\_SYNTHESIS\_AND\_INTERCONVERSION\_OF\_NUCLEOTIDE\_DI\_AND\_TRIPHOSPHATES  
REACTOME\_GLUCOSE\_METABOLISM  
REACTOME\_TRANSMEMBRANE\_TRANSPORT\_OF\_SMALL\_MOLECULES  
KEGG\_BASE\_EXCISION\_REPAIR  
REACTOME\_VPR\_MEDIATED\_NUCLEAR\_IMPORT\_OF\_PICIS  
BIOCARTA\_ERYTH\_PATHWAY  
REACTOME\_THE\_ROLE\_OF\_NEF\_IN\_HIV1\_REPLICATION\_AND\_DISEASE\_PATHOGENESIS  
REACTOME\_P75NTR\_SIGNALS\_VIA\_NFKB  
REACTOME\_REV\_MEDIATED\_NUCLEAR\_EXPORT\_OF\_HIV1\_RNA  
REACTOME\_TRANSPORT\_OF\_RIBONUCLEOPROTEINS\_INTO\_THE\_HOST\_NUCLEUS  
REACTOME\_NUCLEOTIDE\_LIKE\_PURINERGIC\_RECEPTORS  
REACTOME\_CD28\_DEPENDENT\_PI3K\_AKT\_SIGNALING  
REACTOME\_E2F\_MEDIATED\_REGULATION\_OF\_DNA\_REPLICATION  
BIOCARTA\_CHEMICAL\_PATHWAY



KEGG\_PYRIMIDINE\_METABOLISM  
 KEGG\_PRION\_DISEASES  
 KEGG\_NITROGEN\_METABOLISM  
 KEGG\_NEUROTROPHIN\_SIGNALING\_PATHWAY  
 REACTOME\_GLUCOSE\_AND\_OTHER\_SUGAR\_SLC\_TRANSPORTERS  
 REACTOME\_METABOLISM\_OF\_AMINO\_ACIDS  
 BIOCARTA\_LYM\_PATHWAY  
 BIOCARTA\_MAPK\_PATHWAY  
 REACTOME\_PHOSPHORYLATION\_OF\_CD3\_AND\_TCR\_ZETA\_CHAINS  
 ST\_INTERLEUKIN\_13\_PATHWAY  
 REACTOME\_SLC\_MEDIATED\_TRANSMEMBRANE\_TRANSPORT  
 KEGG\_AMYOTROPHIC\_LATERAL\_SCLEROSIS\_ALS  
 ST\_INTERFERON\_GAMMA\_PATHWAY  
 ST\_IL\_13\_PATHWAY  
 BIOCARTA\_TCR\_PATHWAY  
 KEGG\_DRUG\_METABOLISM\_CYTOCHROME\_P450  
 KEGG\_METABOLISM\_OF\_XENOBIOTICS\_BY\_CYTOCHROME\_P450  
 KEGG\_VASCULAR\_SMOOTH\_MUSCLE\_CONTRACTION  
 REACTOME\_PHASE\_1\_FUNCTIONALIZATION\_OF\_COMPOUNDS  
 KEGG\_HEDGEHOG\_SIGNALING\_PATHWAY  
 KEGG\_VALINE\_LEUCINE\_AND\_ISOLEUCINE\_DEGRADATION  
 KEGG\_BASAL\_CELL\_CARCINOMA  
 REACTOME\_MUSCLE\_CONTRACTION  
 REACTOME\_PHOSPHOLIPASE\_CMEDIATED\_CASCADE  
 KEGG\_DILATED\_CARDIOMYOPATHY  
 REACTOME\_MYOGENESIS  
 REACTOME\_BIOLOGICAL\_OXIDATIONS  
 KEGG\_PROANOATE\_METABOLISM  
 KEGG\_MELANOGENESIS  
 REACTOME\_FGFR\_LIGAND\_BINDING\_AND\_ACTIVATION

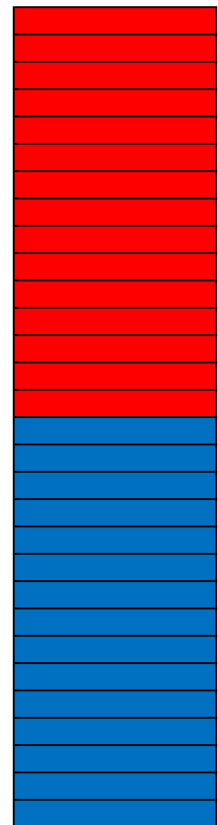

**LIVER**

**Gene Set**

**Enrichment Profile**

REACTOME\_CYTOSOLIC\_TRNA\_AMINOACYLATION  
 BIOCARTA\_KERATINOCYTE\_PATHWAY  
 BIOCARTA\_EGF\_PATHWAY  
 REACTOME\_TOLL\_RECEPTOR\_CASCADES  
 BIOCARTA\_GSK3\_PATHWAY  
 BIOCARTA\_PDGF\_PATHWAY  
 REACTOME\_TOLL\_LIKE\_RECEPTOR\_4\_CASCADE  
 BIOCARTA\_IL6\_PATHWAY  
 BIOCARTA\_ATM\_PATHWAY  
 BIOCARTA\_MAPK\_PATHWAY  
 REACTOME\_ACTIVATED\_TLR4\_SIGNALLING  
 BIOCARTA\_41BB\_PATHWAY  
 BIOCARTA\_NFKB\_PATHWAY  
 BIOCARTA\_RELA\_PATHWAY  
 KEGG\_TOLL\_LIKE\_RECEPTOR\_SIGNALING\_PATHWAY  
 REACTOME\_INNATE\_IMMUNITY\_SIGNALING  
 BIOCARTA\_TOLL\_PATHWAY  
 REACTOME\_TOLL\_LIKE\_RECEPTOR\_9\_CASCADE  
 REACTOME\_TOLL\_LIKE\_RECEPTOR\_3\_CASCADE  
 KEGG\_RIG\_I\_LIKE\_RECEPTOR\_SIGNALING\_PATHWAY  
 BIOCARTA\_HER2\_PATHWAY  
 REACTOME\_NUCLEAR\_IMPORT\_OF\_REV\_PROTEIN  
 BIOCARTA\_MET\_PATHWAY  
 KEGG\_MAPK\_SIGNALING\_PATHWAY  
 ST\_JNK\_MAPK\_PATHWAY  
 BIOCARTA\_TNFR2\_PATHWAY  
 REACTOME\_SIGNALING\_IN\_IMMUNE\_SYSTEM  
 BIOCARTA\_GLEEVEC\_PATHWAY  
 BIOCARTA\_TPO\_PATHWAY  
 REACTOME\_METAL\_ION\_SLC\_TRANSPORTERS  
 BIOCARTA\_INSULIN\_PATHWAY  
 BIOCARTA\_VEGF\_PATHWAY  
 REACTOME\_GLUCOSE\_TRANSPORT

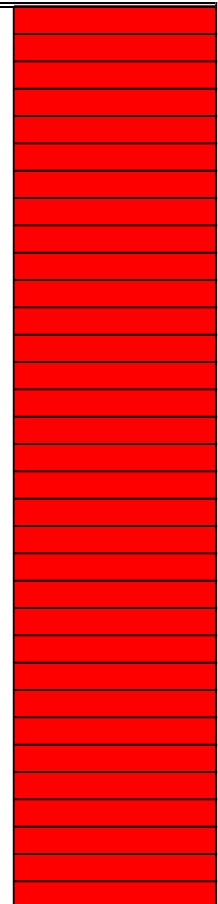

REACTOME\_MYD88\_CASCADE  
REACTOME\_REGULATION\_OF\_LIPID\_METABOLISM\_BY\_PEROXISOME\_PROLIFERATOR\_ACTIVATED\_RECEPTOR\_ALPHA  
BIOCARTA\_RANKL\_PATHWAY  
REACTOME\_TRAF6\_MEDIATED\_INDUCION\_OF\_THE\_ANTIVIRAL\_CYTOKINE\_IFN\_ALPHA\_BETA\_CASCADE  
REACTOME\_REGULATION\_OF\_GLUCOKINASE\_BY\_GLUCOKINASE\_REGULATORY\_PROTEIN  
REACTOME\_TIE2\_SIGNALING  
BIOCARTA\_IL22BP\_PATHWAY  
BIOCARTA\_ARENRF2\_PATHWAY  
BIOCARTA\_P38MAPK\_PATHWAY  
BIOCARTA\_NTHI\_PATHWAY  
BIOCARTA\_TOB1\_PATHWAY  
REACTOME\_TRNA\_AMINOACYLATION  
REACTOME\_NEP\_NS2\_INTERACTS\_WITH\_THE\_CELLULAR\_EXPORT\_MACHINERY  
KEGG\_JAK\_STAT\_SIGNALING\_PATHWAY  
REACTOME\_MAPK\_TARGETS\_NUCLEAR\_EVENTS\_MEDIATED\_BY\_MAP\_KINASES  
KEGG\_RENAL\_CELL\_CARCINOMA  
BIOCARTA\_PML\_PATHWAY  
REACTOME\_GAB1\_SIGNALOSOME  
REACTOME\_DOWNSTREAM\_TCR\_SIGNALING  
REACTOME\_MAP\_KINASES\_ACTIVATION\_IN\_TLR\_CASCADE  
ST\_INTERLEUKIN\_4\_PATHWAY  
BIOCARTA\_IL1R\_PATHWAY  
REACTOME\_SIGNALING\_BY\_EGFR  
KEGG\_DORSO\_VENTRAL\_AXIS\_FORMATION  
REACTOME\_COMMON\_PATHWAY  
BIOCARTA\_CDMAC\_PATHWAY  
REACTOME\_REV\_MEDIATED\_NUCLEAR\_EXPORT\_OF\_HIV1\_RNA  
REACTOME\_TRANSPORT\_OF\_RIBONUCLEOPROTEINS\_INTO\_THE\_HOST\_NUCLEUS  
BIOCARTA\_CTCF\_PATHWAY  
BIOCARTA\_LYM\_PATHWAY  
BIOCARTA\_IL2\_PATHWAY  
KEGG\_LEISHMANIA\_INFECTION  
KEGG\_ERBB\_SIGNALING\_PATHWAY  
KEGG\_EPITHELIAL\_CELL\_SIGNALING\_IN\_HELICOBACTER\_PYLORI\_INFECTION  
REACTOME\_GRB2\_SOS\_PROVIDES\_LINKAGE\_TO\_MAPK\_SIGNALING\_FOR\_INTERGRINS\_  
REACTOME\_P75NTR\_SIGNALS\_VIA\_NFKB  
BIOCARTA\_STRESS\_PATHWAY  
BIOCARTA\_MTOR\_PATHWAY  
REACTOME\_PI3K\_AKT\_SIGNALLING  
REACTOME\_DOWN\_STREAM\_SIGNAL\_TRANSDUCTION  
REACTOME\_TRANSPORT\_OF\_THE\_SLBP\_INDEPENDENT\_MATURE\_MRNA  
BIOCARTA\_RNA\_PATHWAY  
KEGG\_CYTOSOLIC\_DNA\_SENSING\_PATHWAY  
REACTOME\_GENE\_EXPRESSION  
ST\_GA13\_PATHWAY  
BIOCARTA\_CARDIACEGF\_PATHWAY  
REACTOME\_VIRAL\_DSRNA\_TLR3\_TRIF\_COMPLEX\_ACTIVATES\_RIP1  
REACTOME\_G\_ALPHA\_12\_13\_SIGNALLING\_EVENTS  
BIOCARTA\_IGF1\_PATHWAY  
BIOCARTA\_AT1R\_PATHWAY  
ST\_G\_ALPHA\_I\_PATHWAY  
BIOCARTA\_HIF\_PATHWAY  
KEGG\_PROSTATE\_CANCER  
ST\_DIFFERENTIATION\_PATHWAY\_IN\_PC12\_CELLS  
REACTOME\_HUMAN\_TAK1\_ACTIVATES\_NFKB\_BY\_PHOSPHORYLATION\_AND\_ACTIVATION\_OF\_IKKS\_COMPLEX  
KEGG\_ADHERENS\_JUNCTION  
REACTOME\_ELECTRON\_TRANSPORT\_CHAIN  
KEGG\_PROTEIN\_EXPORT  
REACTOME\_PHASE\_1\_FUNCTIONALIZATION\_OF\_COMPOUNDS  
KEGG\_PARKINSONS\_DISEASE  
REACTOME\_CYTOCHROME\_P450\_ARRANGED\_BY\_SUBSTRATE\_TYPE  
REACTOME\_SYNTHESIS\_OF\_BILE\_ACIDS\_AND\_BILE\_SALTS  
KEGG\_PRIMARY\_BILE\_ACID\_BIOSYNTHESIS  
KEGG\_STEROID\_HORMONE\_BIOSYNTHESIS  
REACTOME\_POST\_CHAPERONIN\_TUBULIN\_FOLDING\_PATHWAY  
REACTOME\_FORMATION\_OF\_TUBULIN\_FOLDING\_INTERMEDIATES\_BY\_CCT\_TRIC

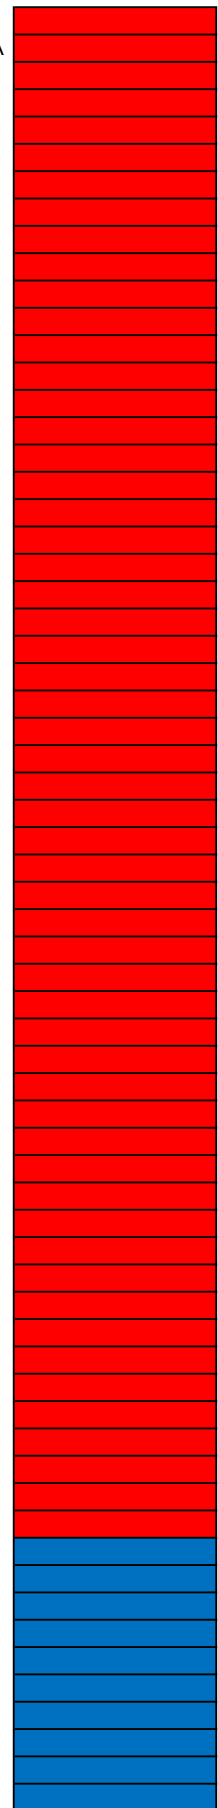

REACTOME\_METABOLISM\_OF\_BILE\_ACIDS\_AND\_BILE\_SALTS  
 REACTOME\_SYNTHESIS\_OF\_BILE\_ACIDS\_AND\_BILE\_SALTS\_VIA\_7ALPHA\_HYDROXYCHOLESTEROL  
 KEGG\_OXIDATIVE\_PHOSPHORYLATION  
 REACTOME\_ENDOGENOUS\_STEROLS  
 REACTOME\_AMINE\_DERIVED\_HORMONES

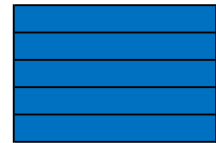

**KIDNEY**

| Gene Set                                                                             | Enrichment Profile |
|--------------------------------------------------------------------------------------|--------------------|
| BIOCARTA_EGF_PATHWAY                                                                 |                    |
| REACTOME_CYTOSOLIC_TRNA_AMINOACYLATION                                               |                    |
| BIOCARTA_GSK3_PATHWAY                                                                |                    |
| BIOCARTA_MAPK_PATHWAY                                                                |                    |
| REACTOME_TRAF6_MEDIATED_INDUCION_OF_THE_ANTIVIRAL_CYTOKINE_IFN_ALPHA_BETA_CASCADE    |                    |
| REACTOME_TOLL_LIKE_RECEPTOR_3_CASCADE                                                |                    |
| BIOCARTA_PDGF_PATHWAY                                                                |                    |
| REACTOME_MAP_KINASES_ACTIVATION_IN_TLR_CASCADE                                       |                    |
| ST_JNK_MAPK_PATHWAY                                                                  |                    |
| KEGG_ADHERENS_JUNCTION                                                               |                    |
| KEGG_CHRONIC_MYELOID_LEUKEMIA                                                        |                    |
| KEGG_ERBB_SIGNALING_PATHWAY                                                          |                    |
| REACTOME_TOLL_RECEPTOR_CASCADES                                                      |                    |
| KEGG_JAK_STAT_SIGNALING_PATHWAY                                                      |                    |
| BIOCARTA_IL6_PATHWAY                                                                 |                    |
| ST_DIFFERENTIATION_PATHWAY_IN_PC12_CELLS                                             |                    |
| REACTOME_MAPK_TARGETS_NUCLEAR_EVENTS_MEDIATED_BY_MAP_KINASES                         |                    |
| BIOCARTA_TGFB_PATHWAY                                                                |                    |
| BIOCARTA_TPO_PATHWAY                                                                 |                    |
| BIOCARTA_MET_PATHWAY                                                                 |                    |
| BIOCARTA_INSULIN_PATHWAY                                                             |                    |
| ST_PHOSPHOINOSITIDE_3_KINASE_PATHWAY                                                 |                    |
| BIOCARTA_CTCF_PATHWAY                                                                |                    |
| BIOCARTA_GLEEVEC_PATHWAY                                                             |                    |
| REACTOME_SIGNALING_BY_EGFR                                                           |                    |
| KEGG_DORSO_VENTRAL_AXIS_FORMATION                                                    |                    |
| REACTOME_SIGNALLING_BY_NGF                                                           |                    |
| BIOCARTA_PPARA_PATHWAY                                                               |                    |
| KEGG_NEUROTROPHIN_SIGNALING_PATHWAY                                                  |                    |
| REACTOME_TRANSPORT_OF_RIBONUCLEOPROTEINS_INTO_THE_HOST_NUCLEUS                       |                    |
| REACTOME_BETACATENIN_PHOSPHORYLATION_CASCADE                                         |                    |
| BIOCARTA_TNFR2_PATHWAY                                                               |                    |
| KEGG_ACUTE_MYELOID_LEUKEMIA                                                          |                    |
| KEGG_PATHOGENIC_ESCHERICHIA_COLI_INFECTON                                            |                    |
| KEGG_RENAL_CELL_CARCINOMA                                                            |                    |
| BIOCARTA_SPRY_PATHWAY                                                                |                    |
| KEGG_MAPK_SIGNALING_PATHWAY                                                          |                    |
| BIOCARTA_RACCYCD_PATHWAY                                                             |                    |
| BIOCARTA_VEGF_PATHWAY                                                                |                    |
| BIOCARTA_AT1R_PATHWAY                                                                |                    |
| BIOCARTA_CARDIACEGF_PATHWAY                                                          |                    |
| REACTOME_HUMAN_TAK1_ACTIVATES_NFKB_BY_PHOSPHORYLATION_AND_ACTIVATION_OF_IKKS_COMPLEX |                    |
| BIOCARTA_NGF_PATHWAY                                                                 |                    |
| REACTOME_JNK_PHOSPHORYLATION_AND_ACTIVATION_MEDIATED_BY_ACTIVATED_HUMAN_TAK1         |                    |
| KEGG_PANCREATIC_CANCER                                                               |                    |
| REACTOME_DOWNSTREAM_TCR_SIGNALING                                                    |                    |
| BIOCARTA_MTOR_PATHWAY                                                                |                    |
| REACTOME_G_ALPHA_12_13_SIGNALLING_EVENTS                                             |                    |
| BIOCARTA_IL2RB_PATHWAY                                                               |                    |
| REACTOME_P75NTR_SIGNALS_VIA_NFKB                                                     |                    |
| REACTOME_PI3K_AKT_SIGNALLING                                                         |                    |
| BIOCARTA_WNT_PATHWAY                                                                 |                    |
| BIOCARTA_P53_PATHWAY                                                                 |                    |
| REACTOME_NUCLEAR_IMPORT_OF_REV_PROTEIN                                               |                    |
| BIOCARTA_PTEN_PATHWAY                                                                |                    |
| BIOCARTA_P53HYPOXIA_PATHWAY                                                          |                    |
| BIOCARTA_KERATINOCYTE_PATHWAY                                                        |                    |
| REACTOME_VPR_MEDIATED_NUCLEAR_IMPORT_OF_PICS                                         |                    |

BIOCARTA\_P38MAPK\_PATHWAY  
ST\_GRANULE\_CELL\_SURVIVAL\_PATHWAY  
REACTOME\_IRS\_RELATED\_EVENTS  
KEGG\_ENDOMETRIAL\_CANCER  
ST\_FAS\_SIGNALING\_PATHWAY  
BIOCARTA\_IL22BP\_PATHWAY  
REACTOME\_NUCLEAR\_EVENTS\_KINASE\_AND\_TRANSCRIPTION\_FACTOR\_ACTIVATION  
BIOCARTA\_CD40\_PATHWAY  
KEGG\_SMALL\_CELL\_LUNG\_CANCER  
REACTOME\_SIGNALING\_BY\_TGF\_BETA  
ST\_GA13\_PATHWAY  
BIOCARTA\_LYM\_PATHWAY  
REACTOME\_NOTCH\_HLH\_TRANSCRIPTION\_PATHWAY  
REACTOME\_CELLEXTRACELLULAR\_MATRIX\_INTERACTIONS  
KEGG\_COLORECTAL\_CANCER  
KEGG\_TIGHT\_JUNCTION  
BIOCARTA\_HER2\_PATHWAY  
REACTOME\_INNATE\_IMMUNITY\_SIGNALING  
KEGG\_PROSTATE\_CANCER  
REACTOME\_EGFR\_DOWNREGULATION  
REACTOME\_REGULATION\_OF\_GLUKOKINASE\_BY\_GLUKOKINASE\_REGULATORY\_PROTEIN  
REACTOME\_SIGNALING\_IN\_IMMUNE\_SYSTEM  
REACTOME\_VIRAL\_DSRNA\_TLR3\_TRIF\_COMPLEX\_ACTIVATES\_RIP1  
BIOCARTA\_ATM\_PATHWAY  
BIOCARTA\_41BB\_PATHWAY  
KEGG\_REGULATION\_OF\_ACTIN\_CYTOSKELETON  
BIOCARTA\_EPO\_PATHWAY  
KEGG\_INOSITOL\_PHOSPHATE\_METABOLISM  
REACTOME\_TRNA\_AMINOACYLATION  
REACTOME\_APOPTOTIC\_EXECUTION\_PHASE  
KEGG\_CIRCADIAN\_RHYTHM\_MAMMAL  
BIOCARTA\_MONOCYTE\_PATHWAY  
ST\_TUMOR\_NECROSIS\_FACTOR\_PATHWAY  
REACTOME\_ERKS\_ARE\_INACTIVATED  
KEGG\_FATTY\_ACID\_METABOLISM  
BIOCARTA\_IGF1\_PATHWAY  
BIOCARTA\_IL7\_PATHWAY  
BIOCARTA\_ERK5\_PATHWAY  
ST\_INTERLEUKIN\_4\_PATHWAY  
REACTOME\_SIGNALING\_BY\_BMP  
BIOCARTA\_FIBRINOLYSIS\_PATHWAY  
KEGG\_TGF\_BETA\_SIGNALING\_PATHWAY  
KEGG\_TOLL\_LIKE\_RECEPTOR\_SIGNALING\_PATHWAY  
BIOCARTA\_TCR\_PATHWAY  
BIOCARTA\_TOLL\_PATHWAY  
BIOCARTA\_FCER1\_PATHWAY  
BIOCARTA\_EPONFKB\_PATHWAY  
BIOCARTA\_CXCR4\_PATHWAY  
BIOCARTA\_CDMAC\_PATHWAY  
BIOCARTA\_CREB\_PATHWAY  
BIOCARTA\_RELA\_PATHWAY  
KEGG\_WNT\_SIGNALING\_PATHWAY  
REACTOME\_TRANSPORT\_OF\_MATURE\_MRNA\_DERIVED\_FROM\_AN\_INTRON\_CONTAINING\_TRANSCRIPT  
BIOCARTA\_NFKB\_PATHWAY  
KEGG\_MTOR\_SIGNALING\_PATHWAY  
REACTOME\_ERK\_MAPK\_TARGETS  
KEGG\_NON\_SMALL\_CELL\_LUNG\_CANCER  
BIOCARTA\_RANKL\_PATHWAY  
KEGG\_LEUKOCYTE\_TRANSENDOTHELIAL\_MIGRATION  
BIOCARTA\_ALK\_PATHWAY  
REACTOME\_NEP\_NS2\_INTERACTS\_WITH\_THE\_CELLULAR\_EXPORT\_MACHINERY  
REACTOME\_TCR\_SIGNALING  
KEGG\_PATHWAYS\_IN\_CANCER  
REACTOME\_CELL\_JUNCTION\_ORGANIZATION  
REACTOME\_SIGNAL\_ATTENUATION  
BIOCARTA\_IGF1R\_PATHWAY

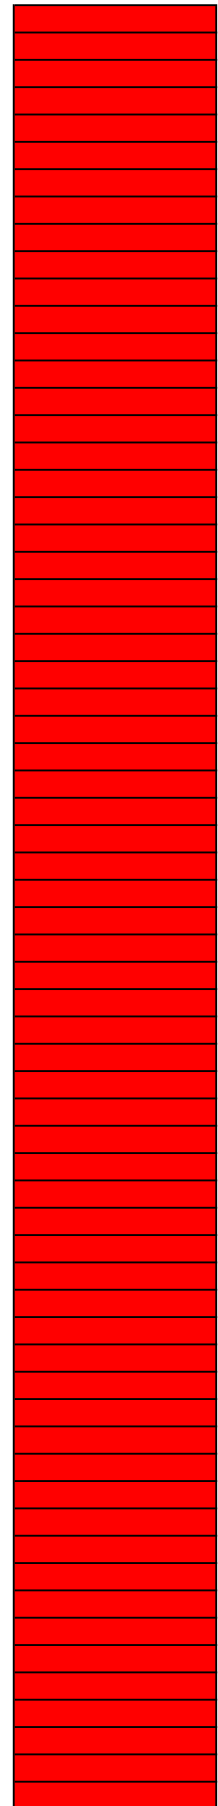

BIOCARTA\_VIP\_PATHWAY  
BIOCARTA\_PITX2\_PATHWAY  
KEGG\_LEISHMANIA\_INFECTION  
BIOCARTA\_GH\_PATHWAY  
REACTOME\_DOWN\_STREAM\_SIGNAL\_TRANSDUCTION  
REACTOME\_AMINO\_ACID\_TRANSPORT\_ACROSS\_THE\_PLASMA\_MEMBRANE  
ST\_B\_CELL\_ANTIGEN\_RECEPTOR  
BIOCARTA\_NTHI\_PATHWAY  
KEGG\_GLIOMA  
BIOCARTA\_ARENRF2\_PATHWAY  
REACTOME\_P75\_NTR\_RECEPTOR\_MEDIATED\_SIGNALLING  
BIOCARTA\_TRKA\_PATHWAY  
BIOCARTA\_INTEGRIN\_PATHWAY  
REACTOME\_NF\_KB\_IS\_ACTIVATED\_AND\_SIGNALS\_SURVIVAL  
BIOCARTA\_PAR1\_PATHWAY  
REACTOME\_GAB1\_SIGNALOSOME  
BIOCARTA\_ARF\_PATHWAY  
REACTOME\_GLUCOSE\_TRANSPORT  
BIOCARTA\_EIF\_PATHWAY  
BIOCARTA\_EDG1\_PATHWAY  
BIOCARTA\_LAIR\_PATHWAY  
BIOCARTA\_GRANULOCYTES\_PATHWAY  
REACTOME\_PROCESSING\_OF\_CAPPED\_INTRON\_CONTAINING\_PRE\_MRNA  
REACTOME\_OTHER\_SEMAPHORIN\_INTERACTIONS  
REACTOME\_REV\_MEDIATED\_NUCLEAR\_EXPORT\_OF\_HIV1\_RNA  
BIOCARTA\_IGF1MTOR\_PATHWAY  
BIOCARTA\_ERK\_PATHWAY  
KEGG\_PROXIMAL\_TUBULE\_BICARBONATE\_RECLAMATION  
KEGG\_LYSINE\_DEGRADATION  
BIOCARTA\_DREAM\_PATHWAY  
BIOCARTA\_HIVNEF\_PATHWAY  
REACTOME\_SEMAPHORIN\_INTERACTIONS  
KEGG\_AMINOACYL\_TRNA\_BIOSYNTHESIS  
KEGG\_FC\_GAMMA\_R\_MEDIATED\_PHAGOCYTOSIS  
KEGG\_B\_CELL\_RECEPTOR\_SIGNALING\_PATHWAY  
BIOCARTA\_EIF4\_PATHWAY  
BIOCARTA\_ECM\_PATHWAY  
REACTOME\_GENERIC\_TRANSCRIPTION\_PATHWAY  
KEGG\_T\_CELL\_RECEPTOR\_SIGNALING\_PATHWAY  
BIOCARTA\_AGR\_PATHWAY  
REACTOME\_TRKA\_SIGNALLING\_FROM\_THE\_PLASMA\_MEMBRANE  
REACTOME\_P75NTR\_RECRUITS\_SIGNALLING\_COMPLEXES  
REACTOME\_MITOCHONDRIAL\_FATTY\_ACID\_BETA\_OXIDATION  
REACTOME\_NRAGE\_SIGNALS\_DEATH\_THROUGH\_JNK  
BIOCARTA\_IL2\_PATHWAY  
KEGG\_PHOSPHATIDYLINOSITOL\_SIGNALING\_SYSTEM  
REACTOME\_GENE\_EXPRESSION  
ST\_ERK1\_ERK2\_MAPK\_PATHWAY  
BIOCARTA\_EIF2\_PATHWAY  
REACTOME\_APOPTOTIC\_CLEAVAGE\_OF\_CELL\_ADHESION\_PROTEINS  
KEGG\_APOPTOSIS  
BIOCARTA\_RNA\_PATHWAY  
REACTOME\_SEMA4D\_INDUCED\_CELL\_MIGRATION\_AND\_GROWTH\_CONE\_COLLAPSE  
REACTOME\_SEMA4D\_IN\_SEMAPHORIN\_SIGNALING  
BIOCARTA\_BCELLSURVIVAL\_PATHWAY  
REACTOME\_APOPTOSIS\_INDUCED\_DNA\_FRAGMENTATION  
BIOCARTA\_CDC42RAC\_PATHWAY  
KEGG\_ENDOCYTOSIS  
REACTOME\_DEADENYLATION\_OF\_MRNA  
REACTOME\_CELL\_SURFACE\_INTERACTIONS\_AT\_THE\_VASCULAR\_WALL  
REACTOME\_AMINO\_ACID\_SYNTHESIS\_AND\_INTERCONVERSION  
KEGG\_THYROID\_CANCER  
REACTOME\_CELL\_DEATH\_SIGNALLING\_VIA\_NRAGE\_NRIF\_AND\_NADE  
REACTOME\_COSTIMULATION\_BY\_THE\_CD28\_FAMILY  
KEGG\_ADIPOCYTOKINE\_SIGNALING\_PATHWAY  
KEGG\_INSULIN\_SIGNALING\_PATHWAY





REACTOME\_ACTIVATED\_AMPK\_STIMULATES\_FATTY\_ACID\_OXIDATION\_IN\_MUSCLE  
BIOCARTA\_IL3\_PATHWAY  
REACTOME\_MRNA\_3\_END\_PROCESSING  
BIOCARTA\_VITCB\_PATHWAY  
REACTOME\_CD28\_CO\_STIMULATION  
BIOCARTA\_PTDINS\_PATHWAY  
REACTOME\_SPHINGOLIPID\_METABOLISM  
REACTOME\_SHC\_RELATED\_EVENTS  
BIOCARTA\_ETS\_PATHWAY  
REACTOME\_REGULATION\_OF\_RHEB\_GTPASE\_ACTIVITY\_BY\_AMPK  
BIOCARTA\_IL1R\_PATHWAY  
REACTOME\_MTOR\_SIGNALLING  
KEGG\_NOTCH\_SIGNALING\_PATHWAY  
KEGG\_NITROGEN\_METABOLISM  
REACTOME\_CHOLESTEROL\_BIOSYNTHESIS  
REACTOME\_ELECTRON\_TRANSPORT\_CHAIN  
REACTOME\_STEROID\_METABOLISM  
REACTOME\_NCAM1\_INTERACTIONS  
KEGG\_OXIDATIVE\_PHOSPHORYLATION  
KEGG\_RIBOSOME  
KEGG\_TERPENOID\_BACKBONE\_BIOSYNTHESIS  
KEGG\_PARKINSONS\_DISEASE  
KEGG\_PROTEIN\_EXPORT  
REACTOME\_TRANSFORMATION\_OF\_LANOSTEROL\_TO\_CHOLESTEROL  
REACTOME\_VIRAL\_MRNA\_TRANSLATION  
KEGG\_PYRIMIDINE\_METABOLISM  
REACTOME\_INFLUENZA\_VIRAL\_RNA\_TRANSCRIPTION\_AND\_REPLICATION  
REACTOME\_PEPTIDE\_CHAIN\_ELONGATION  
REACTOME\_REGULATION\_OF\_GENE\_EXPRESSION\_IN\_BETA\_CELLS  
REACTOME\_FORMATION\_OF\_THE\_EARLY\_ELONGATION\_COMPLEX  
KEGG\_DNA\_REPLICATION  
REACTOME\_INSULIN\_SYNTHESIS\_AND\_SECRETION

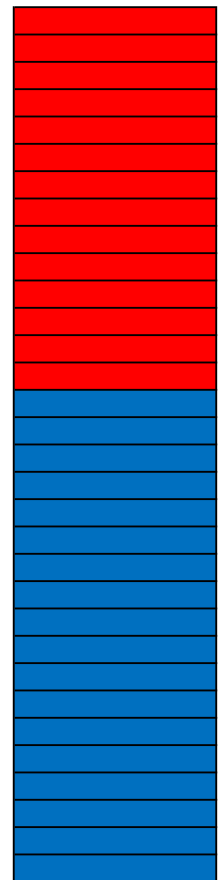

Supplement: NIHMS728918-supplement-Supplemental_Data_File___doc___tif__pdf__etc___1.pdf [file NIHMS728918-supplement-Supplemental_Data_File___doc___tif__pdf__etc___1.pdf]
