# Supplementary material
Source: PubMed Central journal article supplement (PMC4715796)
Supplement: NIHMS728918-supplement-Supplemental_Data_File___doc___tif__pdf__etc___2.pdf [file NIHMS728918-supplement-Supplemental_Data_File___doc___tif__pdf__etc___2.pdf]

**Supplementary Table 2.** Members of the MODS-associated Module 2 network (please refer to Figure 3 in main manuscript).

| Symbol   | Gene Name                                                      | Location            | Pharmacologic agents targeting network node                                                                                                 |
|----------|----------------------------------------------------------------|---------------------|---------------------------------------------------------------------------------------------------------------------------------------------|
| AKT1     | v-akt murine thymoma viral oncogene homolog 1                  | Cytoplasm           | enzastaurin                                                                                                                                 |
| AKT2     | v-akt murine thymoma viral oncogene homolog 2                  | Cytoplasm           | enzastaurin                                                                                                                                 |
| BCL2L1   | BCL2-like 1                                                    | Cytoplasm           |                                                                                                                                             |
| BCR      | breakpoint cluster region                                      | Cytoplasm           | imatinib                                                                                                                                    |
| CBL      | Cbl proto-oncogene, E3 ubiquitin protein ligase                | Nucleus             |                                                                                                                                             |
| CBLB     | Cbl proto-oncogene, E3 ubiquitin protein ligase B              | Nucleus             |                                                                                                                                             |
| CBLC     | Cbl proto-oncogene, E3 ubiquitin protein ligase C              | Nucleus             |                                                                                                                                             |
| CCND1    | cyclin D1                                                      | Nucleus             |                                                                                                                                             |
| CCND2    | cyclin D2                                                      | Nucleus             |                                                                                                                                             |
| CEBPB    | CCAAT/enhancer binding protein (C/EBP), beta                   | Nucleus             |                                                                                                                                             |
| CISH     | cytokine inducible SH2-containing protein                      | Cytoplasm           |                                                                                                                                             |
| CLCF1    | cardiotrophin-like cytokine factor 1                           | Extracellular Space |                                                                                                                                             |
| CNTF     | ciliary neurotrophic factor                                    | Extracellular Space |                                                                                                                                             |
| CNTFR    | ciliary neurotrophic factor receptor                           | Plasma Membrane     |                                                                                                                                             |
| CREBBP   | CREB binding protein                                           | Nucleus             |                                                                                                                                             |
| CRKL     | v-crk sarcoma virus CT10 oncogene homolog (avian)-like         | Cytoplasm           |                                                                                                                                             |
| CRLF2    | cytokine receptor-like factor 2                                | Plasma Membrane     |                                                                                                                                             |
| CSF2     | colony stimulating factor 2 (granulocyte-macrophage)           | Extracellular Space |                                                                                                                                             |
| CSF2RA   | colony stimulating factor 2 receptor, alpha, low-affinity      | Plasma Membrane     | sargramostim, mavrilimumab                                                                                                                  |
| CSF2RB   | colony stimulating factor 2 receptor, beta, low-affinity       | Plasma Membrane     | sargramostim                                                                                                                                |
| CSF3     | colony stimulating factor 3 (granulocyte)                      | Extracellular Space |                                                                                                                                             |
| CSF3R    | colony stimulating factor 3 receptor (granulocyte)             | Plasma Membrane     | pegfilgrastim, filgrastim                                                                                                                   |
| CSNK2A1  | casein kinase 2, alpha 1 polypeptide                           | Cytoplasm           |                                                                                                                                             |
| EGF      | epidermal growth factor                                        | Extracellular Space |                                                                                                                                             |
| EGFR     | epidermal growth factor receptor                               | Plasma Membrane     | cetuximab, AEE788, panitumumab, BMS-599626, ARRY-334543, XL647, caneritinib, gefitinib, HKI-272, PD153035, lapatinib, vandetanib, erlotinib |
| ELK1     | ELK1, member of ETS oncogene family                            | Nucleus             |                                                                                                                                             |
| EP300    | E1A binding protein p300                                       | Nucleus             |                                                                                                                                             |
| FOS      | FBJ murine osteosarcoma viral oncogene homolog                 | Nucleus             |                                                                                                                                             |
| GRB2     | growth factor receptor-bound protein 2                         | Cytoplasm           |                                                                                                                                             |
| IFNAR1   | interferon (alpha, beta and omega) receptor 1                  | Plasma Membrane     | interferon alfacon-1, PEG-interferon alfa-2a, interferon beta-1a, IFNA2, interferon alfa-2b/ribavirin, pegintron, interferon beta-1b        |
| IFNAR2   | interferon (alpha, beta and omega) receptor 2                  | Plasma Membrane     | interferon alfacon-1, PEG-interferon alfa-2a, interferon beta-1a, IFNA2, interferon alfa-2b/ribavirin, pegintron, interferon beta-1b        |
| IFNG     | interferon, gamma                                              | Extracellular Space |                                                                                                                                             |
| IFNGR1   | interferon gamma receptor 1                                    | Plasma Membrane     | interferon gamma-1b                                                                                                                         |
| IFNGR2   | interferon gamma receptor 2 (interferon gamma transducer 1)    | Plasma Membrane     | interferon gamma-1b                                                                                                                         |
| IL10     | interleukin 10                                                 | Extracellular Space |                                                                                                                                             |
| IL10RA   | interleukin 10 receptor, alpha                                 | Plasma Membrane     |                                                                                                                                             |
| IL10RB   | interleukin 10 receptor, beta                                  | Plasma Membrane     |                                                                                                                                             |
| IL11     | interleukin 11                                                 | Extracellular Space |                                                                                                                                             |
| IL12B    | interleukin 12B                                                | Extracellular Space | ustekinumab                                                                                                                                 |
| IL12RB1  | interleukin 12 receptor, beta 1                                | Plasma Membrane     |                                                                                                                                             |
| IL13RA1  | interleukin 13 receptor, alpha 1                               | Plasma Membrane     | cintridekin besudotox                                                                                                                       |
| IL13RA2  | interleukin 13 receptor, alpha 2                               | Plasma Membrane     | cintridekin besudotox                                                                                                                       |
| IL15     | interleukin 15                                                 | Extracellular Space |                                                                                                                                             |
| IL15RA   | interleukin 15 receptor, alpha                                 | Plasma Membrane     |                                                                                                                                             |
| IL21R    | interleukin 21 receptor                                        | Plasma Membrane     |                                                                                                                                             |
| IL22     | interleukin 22                                                 | Extracellular Space |                                                                                                                                             |
| IL23A    | interleukin 23, alpha subunit p19                              | Extracellular Space |                                                                                                                                             |
| IL24     | interleukin 24                                                 | Extracellular Space |                                                                                                                                             |
| IL2RA    | interleukin 2 receptor, alpha                                  | Plasma Membrane     | LMB-2, dactilimumab, basiliximab, aldesleukin, denileukin diftitox                                                                          |
| IL2RB    | interleukin 2 receptor, beta                                   | Plasma Membrane     | monoclonal antibody M1k-Beta-1, aldesleukin, denileukin diftitox                                                                            |
| IL2RG    | interleukin 2 receptor, gamma                                  | Plasma Membrane     | aldesleukin, denileukin diftitox                                                                                                            |
| IL3RA    | interleukin 3 receptor, alpha (low affinity)                   | Plasma Membrane     |                                                                                                                                             |
| IL6      | interleukin 6 (interferon, beta 2)                             | Extracellular Space | tocilizumab                                                                                                                                 |
| IL6ST    | interleukin 6 signal transducer (gp130, oncostatin M receptor) | Plasma Membrane     |                                                                                                                                             |
| IL7R     | interleukin 7 receptor                                         | Plasma Membrane     | recombinant human interleukin-7                                                                                                             |
| INPP5D   | inositol polyphosphate-5-phosphatase, 145kDa                   | Cytoplasm           |                                                                                                                                             |
| IRF9     | interferon regulatory factor 9                                 | Nucleus             |                                                                                                                                             |
| JAK1     | Janus kinase 1                                                 | Cytoplasm           | ruxolitinib                                                                                                                                 |
| JAK2     | Janus kinase 2                                                 | Cytoplasm           | ruxolitinib                                                                                                                                 |
| JAK3     | Janus kinase 3                                                 | Cytoplasm           |                                                                                                                                             |
| JUN      | jun proto-oncogene                                             | Nucleus             |                                                                                                                                             |
| LCK      | lymphocyte-specific protein tyrosine kinase                    | Cytoplasm           | dasatinib, pazopanib                                                                                                                        |
| LEPR     | leptin receptor                                                | Plasma Membrane     |                                                                                                                                             |
| LIF      | leukemia inhibitory factor                                     | Extracellular Space |                                                                                                                                             |
| MAP2K1   | mitogen-activated protein kinase kinase 1                      | Cytoplasm           | PD 0325901                                                                                                                                  |
| MAP2K4   | mitogen-activated protein kinase kinase 4                      | Cytoplasm           |                                                                                                                                             |
| MAP3K1   | mitogen-activated protein kinase kinase kinase 1               | Cytoplasm           |                                                                                                                                             |
| MAPK8    | mitogen-activated protein kinase 8                             | Cytoplasm           | aplidine                                                                                                                                    |
| MYC      | v-myc myelocytomatosis viral oncogene homolog (avian)          | Nucleus             |                                                                                                                                             |
| OSM      | oncostatin M                                                   | Extracellular Space |                                                                                                                                             |
| OSMR     | oncostatin M receptor                                          | Plasma Membrane     |                                                                                                                                             |
| PDGFA    | platelet-derived growth factor alpha polypeptide               | Extracellular Space |                                                                                                                                             |
| PDGFRA   | platelet-derived growth factor receptor, alpha polypeptide     | Plasma Membrane     | sunitinib, pazopanib, axitinib, telatinib, imatinib, becaperlin                                                                             |
| PIAS4    | protein inhibitor of activated STAT, 4                         | Nucleus             |                                                                                                                                             |
| PIK3CA   | phosphoinositide-3-kinase, catalytic, alpha polypeptide        | Cytoplasm           | SF 1126, PX-866, NVP-BEZ235, BKM120, XL147,                                                                                                 |
| PIK3CB   | phosphoinositide-3-kinase, catalytic, beta polypeptide         | Cytoplasm           | SF 1126, PX-866, NVP-BEZ235, BKM120, XL147,                                                                                                 |
| PIK3CD   | phosphoinositide-3-kinase, catalytic, delta polypeptide        | Cytoplasm           | SF 1126, PX-866, NVP-BEZ235, BKM120, XL147, CAL-101                                                                                         |
| PIK3CG   | phosphoinositide-3-kinase, catalytic, gamma polypeptide        | Cytoplasm           | SF 1126, PX-866, NVP-BEZ235, BKM120, XL147,                                                                                                 |
| PIK3R1   | phosphoinositide-3-kinase, regulatory subunit 1 (alpha)        | Cytoplasm           |                                                                                                                                             |
| PIK3R5   | phosphoinositide-3-kinase, regulatory subunit 5                | Cytoplasm           |                                                                                                                                             |
| PIM1     | pim-1 oncogene                                                 | Cytoplasm           |                                                                                                                                             |
| PLCG1    | phospholipase C, gamma 1                                       | Cytoplasm           |                                                                                                                                             |
| PPP1R13B | protein phosphatase 1, regulatory subunit 13B                  | Cytoplasm           |                                                                                                                                             |
| PRKCA    | protein kinase C, alpha                                        | Cytoplasm           | L-threo-safingol, ingenol 3-angelate                                                                                                        |
| PRLR     | prolactin receptor                                             | Plasma Membrane     |                                                                                                                                             |
| PTPN11   | protein tyrosine phosphatase, non-receptor type 11             | Cytoplasm           |                                                                                                                                             |
| PTPN6    | protein tyrosine phosphatase, non-receptor type 6              | Cytoplasm           |                                                                                                                                             |
| RAF1     | v-raf-1 murine leukemia viral oncogene homolog 1               | Cytoplasm           | CHIR-265, vemurafenib, sorafenib                                                                                                            |
| RASA1    | RAS p21 protein activator (GTPase activating protein) 1        | Cytoplasm           |                                                                                                                                             |
| RPS6KB1  | ribosomal protein S6 kinase, 70kDa, polypeptide 1              | Cytoplasm           |                                                                                                                                             |
| SHC1     | SHC (Src homology 2 domain containing) transforming protein 1  | Cytoplasm           |                                                                                                                                             |
| SOCS1    | suppressor of cytokine signaling 1                             | Cytoplasm           |                                                                                                                                             |
| SOCS3    | suppressor of cytokine signaling 3                             | Cytoplasm           |                                                                                                                                             |
| SOCS4    | suppressor of cytokine signaling 4                             | Cytoplasm           |                                                                                                                                             |
| SOCS5    | suppressor of cytokine signaling 5                             | Extracellular Space |                                                                                                                                             |
| SOCS7    | suppressor of cytokine signaling 7                             | Cytoplasm           |                                                                                                                                             |
| SOS1     | son of sevenless homolog 1 (Drosophila)                        | Cytoplasm           |                                                                                                                                             |
| SOS2     | son of sevenless homolog 2 (Drosophila)                        | Cytoplasm           |                                                                                                                                             |
| SPRED1   | sprouty-related, EVH1 domain containing 1                      | Plasma Membrane     |                                                                                                                                             |
| SPRED2   | sprouty-related, EVH1 domain containing 2                      | Extracellular Space |                                                                                                                                             |
| SPRY2    | sprouty homolog 2 (Drosophila)                                 | Plasma Membrane     |                                                                                                                                             |
| SPRY4    | sprouty homolog 4 (Drosophila)                                 | Plasma Membrane     |                                                                                                                                             |

|        |                                                            |                     |                                    |
|--------|------------------------------------------------------------|---------------------|------------------------------------|
| SRC    | v-src sarcoma (Schmidt-Ruppin A-2) viral oncogene homolog  | Cytoplasm           | dasatinib, AZM-475271, saracatinib |
| SRF    | serum response factor                                      | Nucleus             |                                    |
| STAM   | signal transducing adaptor molecule 1                      | Cytoplasm           |                                    |
| STAM2  | signal transducing adaptor molecule 2                      | Cytoplasm           |                                    |
| STAT1  | signal transducer and activator of transcription 1, 91kDa  | Nucleus             |                                    |
| STAT2  | signal transducer and activator of transcription 2, 113kDa | Nucleus             |                                    |
| STAT3  | signal transducer and activator of transcription 3         | Nucleus             |                                    |
| STAT4  | signal transducer and activator of transcription 4         | Nucleus             |                                    |
| STAT5A | signal transducer and activator of transcription 5A        | Nucleus             |                                    |
| STAT5B | signal transducer and activator of transcription 5B        | Nucleus             |                                    |
| THPO   | thrombopoietin                                             | Extracellular Space |                                    |
