# Supplementary material
Source: PubMed Central journal article supplement (PMC4715796)

**Supplementary Figure S1.** Venn diagram of overlapping differentially expressed genes across organs in early MODS (adjusted P-value < 0.01).

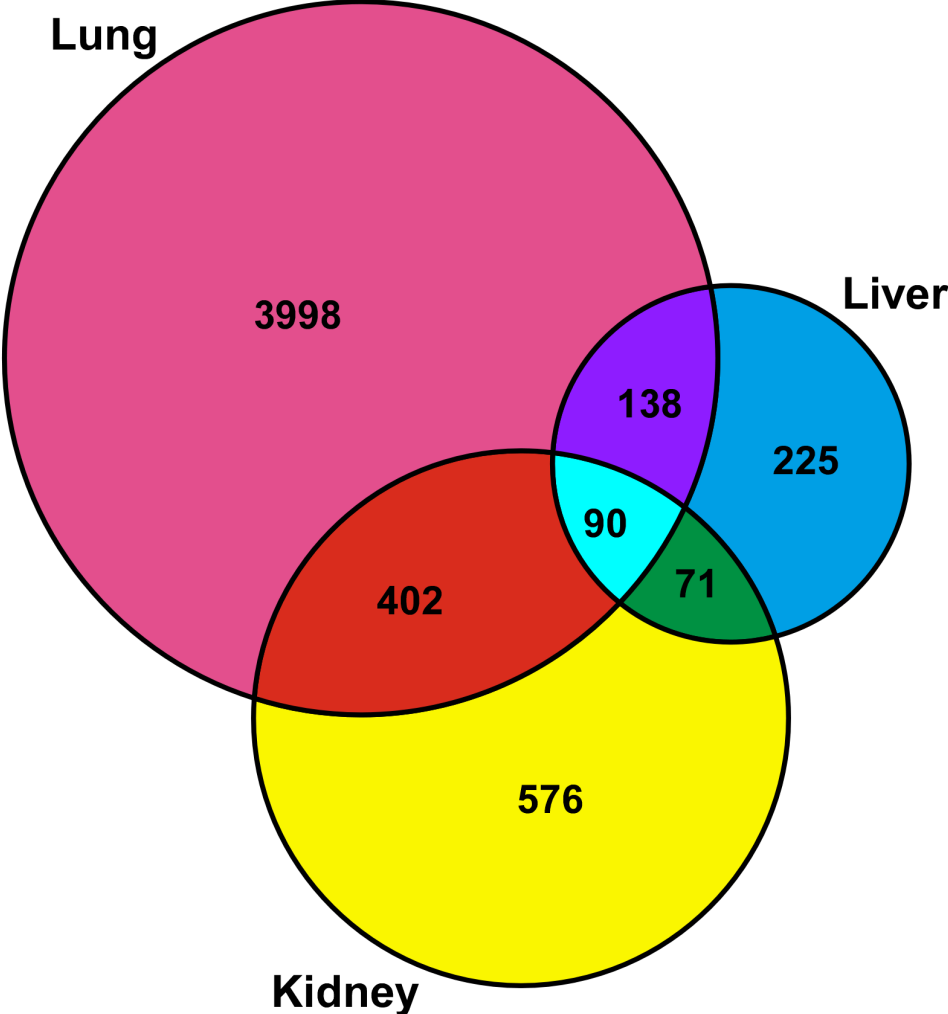

Supplement: NIHMS728918-supplement-Supplemental_Data_File___doc___tif__pdf__etc___3.pdf [file NIHMS728918-supplement-Supplemental_Data_File___doc___tif__pdf__etc___3.pdf]
